# Supplementary material for: VPRBP Functions Downstream of the Androgen Receptor and OGT to Restrict p53 Activation in Prostate Cancer
Source: PubMed Central journal article supplement — Mol Cancer Res. 2022 Mar 29;20(7):1047–60. doi: 10.1158/1541-7786.MCR-21-0477 (PMC9381113; doi:10.1158/1541-7786.mcr-21-0477), 2022-03-29
Supplement: mcr-21-0477_supplementary_tables_1_-_6_suppst1-6.pdf [file mcr-21-0477_supplementary_tables_1_-_6_suppst1-6.pdf]

**Supplementary Table 1**

| <b>Antibody</b>                         | <b>Catalog number</b> | <b>Manufacturer</b>       | <b>Application</b> |
|-----------------------------------------|-----------------------|---------------------------|--------------------|
| <b>Androgen Receptor</b>                | ab74272               | Abcam                     | ChIP-qPCR          |
| <b>RL2</b>                              | ab2739                | Abcam                     | ChIP-qPCR, western |
| <b>p-53</b>                             | sc-126                | Santa Cruz Biotechnology  | ChIP-seq, western  |
| <b>VPRBP</b>                            | ab202587              | Abcam                     | Western, IF        |
| <b>OGT</b>                              | ab177941              | Abcam                     | Western            |
| <b>c-Myc</b>                            | ab32072               | Abcam                     | Western            |
| <b>β-actin</b>                          | ab6276                | Abcam                     | Western            |
| <b>Histone H2A phospho T120</b>         | ab177391              | Abcam                     | Western            |
| <b>Histone H3 (tri methyl K27)</b>      | ab6002                | Abcam                     | Western            |
| <b>Fibrillarin</b>                      | ab4566                | Abcam                     | Western, IF        |
| <b>RPS8</b>                             | ab226361              | Abcam                     | Western            |
| <b>RPL5</b>                             | ab137617              | Abcam                     | Western            |
| <b>G6PD</b>                             | sc-373886             | Santa Cruz Biotechnology  | Western            |
| <b>P73</b>                              | sc-17823              | Santa Cruz Biotechnology  | Western            |
| <b>P63</b>                              | 12143-1-AP            | Proteintech               | Western            |
| <b>Cyclin B1</b>                        | 4138                  | Cell Signaling Technology | Western            |
| <b>PLK1</b>                             | 4513                  | Cell Signaling Technology | Western            |
| <b>phospho-PP1α</b>                     | 2581                  | Cell Signaling Technology | Western            |
| <b>phospho-Histone H3 (Ser10)</b>       | 9701                  | Cell Signaling Technology | Western            |
| <b>phospho-CDK2</b>                     | 2561                  | Cell Signaling Technology | Western            |
| <b>CDK2</b>                             | 2546                  | Cell Signaling Technology | Western            |
| <b>p-FoxM1</b>                          | 14655                 | Cell Signaling Technology | Western            |
| <b>p-21</b>                             | 2947                  | Cell Signaling Technology | Western            |
| <b>goat anti-rabbit</b>                 | 7074                  | Cell Signaling Technology | Western            |
| <b>goat anti-mouse</b>                  | 7076                  | Cell Signaling Technology | Western            |
| <b>CAMKK2</b>                           | HPA017389             | Sigma-Aldrich             | Western            |
| <b>UAP1</b>                             | HPA014659             | Sigma-Aldrich             | Western            |
| <b>OGA</b>                              | HPA036141             | Sigma-Aldrich             | Western            |
| <b>PWP1</b>                             | HPA038708             | Sigma-Aldrich             | Western            |
| <b>Mdm2</b>                             | OP46                  | EMD Millipore             | Western            |
| <b>Alexa flour 594 Goat Anti Mouse</b>  | A11020                | Invitrogen                | IF                 |
| <b>Alexa flour 488 Goat Anti Rabbit</b> | A11070                | Invitrogen                | IF                 |

**Supplementary Table 2**

| <b>ChIP-qPCR primers</b>         | <b>Forward primer</b>    | <b>Reverse primer</b>    |
|----------------------------------|--------------------------|--------------------------|
| <b>CAMKK2 promoter</b>           | AGAACACTGTAGCTCACACAGGCA | GGGCACTTCCCAACCTTTCTTACT |
| <b>Negative AR ChIP</b>          | AACTCCACATTTCTTAAGTGACC  | CCAACCCACACCAAGTACC      |
| <b>VPRBP promoter</b>            | CTTGTTCTGACCTGTGTGCG     | GAGGCGGAGGTCATAGTGAG     |
| <b>Negative RL2 ChIP</b>         | AACTCCACATTTCTTAAGTGACC  | CCAACCCACACCAAGTACC      |
| <b>PAICS/PPAT</b>                | AGCGTACCAAGTCTTGACGG     | CAGCACCCAACAGTAGCGTA     |
| <b>p21 ChIP</b>                  | ACAGCCAGAAGCTCCAAAAA     | TGCCACACACCAGTGACTTT     |
| <b>Negative primer1 p53 ChIP</b> | AACTCCACATTTCTTAAGTGACC  | CCAACCCACACCAAGTACC      |
| <b>Negative primer2 p53 ChIP</b> | TGCCACACACCAGTGACT TT    | ACAGCCAGAAGCTCCAAAAA     |

**Supplementary Table 3**

| <b>Sigma KiCqStart™ PrimerPair ID</b> | <b>Gene Symbol</b> | <b>Gene ID</b> | <b>RefSeq ID</b> | <b>Exons</b> | <b>Species</b> |
|---------------------------------------|--------------------|----------------|------------------|--------------|----------------|
| <b>H_VPRBP_1</b>                      | VPRBP              | 9730           | NM_001171904     | 7-8          | Human          |
| <b>H_CDKN1A_1</b>                     | CDKN1A             | 1026           | NM_000389        | 2-3          | Human          |
| <b>H_MGEA5_1</b>                      | MGEA5              | 10724          | NM_001142434     | 7-8          | Human          |
| <b>H_BAX_1</b>                        | BAX                | 581            | NM_004324        | 3-4          | Human          |
| <b>H_BBC3_1</b>                       | BBC3               | 27113          | NM_001127240     | 4-5          | Human          |
| <b>H_ZNF337_1</b>                     | ZNF337             | 26152          | NM_015655        | NA           | Human          |
| <b>H_DDB2_1</b>                       | DDB2               | 1643           | NM_000107        | 5-6          | Human          |

**Supplementary Table 4**

| <b>Gene</b>    | <b>Forward primer</b>    | <b>Reverse primer</b>     |
|----------------|--------------------------|---------------------------|
| <b>CAMKK2</b>  | TGAAGACCAGGCCCGTTTCTACTT | TGGAAGGTTTGATGTCACGGTGGAA |
| <b>UAP1</b>    | TCCCCACTAAAGAATGCT       | AATTGCTGGAAGGCGAGA        |
| <b>OGT</b>     | GCAGCAGGACCAATTACCTC     | GCATACGTTTCGTTGGTTCTG     |
| <b>TP53</b>    | GATGGTGGTACAGTCAGAGCC    | TCCGAGTGGAAAGGAAATTTGC    |
| <b>RPLPO</b>   | ATCAACGGGTACAAACGAGTC    | CAGATGGATCAGCCAAGAAGG     |
| <b>β-ACTIN</b> | TGGGACGACATGGAGAAAAT     | AGAGGCGTACAGGGATAGCA      |

**Supplementary Table 5**

| <b>siRNA</b>                                                 | <b>Assay ID</b> | <b>Catalog number</b> | <b>Manufacturer</b>      |
|--------------------------------------------------------------|-----------------|-----------------------|--------------------------|
| <b>OGT si1</b>                                               | s16094          | 4390824               | Thermo Fisher Scientific |
| <b>OGT si2</b>                                               | s16095          | 4390824               | Thermo Fisher Scientific |
| <b>DCAF1 si1</b>                                             | s18762          | 4392420               | Thermo Fisher Scientific |
| <b>DCAF1 si2</b>                                             | s18763          | 4392420               | Thermo Fisher Scientific |
| <b>Silencer™ Select<br/>Negative Control<br/>No. 1 siRNA</b> |                 | 4390843               | Thermo Fisher Scientific |

**Supplementary Table 6**

| <b>Parameter</b>                              | <b>n<br/>evaluable</b> | <b>negative<br/>(%)</b> | <b>weak<br/>(%)</b> | <b>moderate<br/>(%)</b> | <b>strong<br/>(%)</b> | <b>p value</b> |
|-----------------------------------------------|------------------------|-------------------------|---------------------|-------------------------|-----------------------|----------------|
| <b>All cancers</b>                            | 2216                   | 5.9                     | 10.3                | 37.6                    | 46.2                  |                |
| <b>Tumor stage</b>                            |                        |                         |                     |                         |                       |                |
| pT2                                           | 1444                   | 8                       | 11                  | 35.5                    | 45.6                  | <0.0001        |
| pT3a                                          | 468                    | 3.2                     | 7.1                 | 38.9                    | 50.9                  |                |
| pT3b-pT4                                      | 277                    | 0.4                     | 11.6                | 46.6                    | 41.5                  |                |
| <b>Gleason grade</b>                          |                        |                         |                     |                         |                       |                |
| ≤3+3                                          | 994                    | 9.4                     | 12.6                | 36.4                    | 41.6                  | <0.0001        |
| 3+4                                           | 998                    | 3.5                     | 8.4                 | 37.7                    | 50.4                  |                |
| 3+4 Tert.5                                    | 1                      | 0                       | 100                 | 0                       | 0                     |                |
| 4+3                                           | 188                    | 1.1                     | 7.4                 | 42                      | 49.5                  |                |
| 4+3 Tert.5                                    | 4                      | 0                       | 25                  | 50                      | 25                    |                |
| ≥4+4                                          | 28                     | 3.6                     | 10.7                | 46.4                    | 39.3                  |                |
| <b>quantitative<br/>Gleason grade</b>         |                        |                         |                     |                         |                       |                |
| ≤3+3                                          | 994                    | 9.4                     | 12.6                | 36.4                    | 41.6                  | 0.0001         |
| 3+4 ≤5%                                       | 213                    | 6.1                     | 7                   | 31.9                    | 54.9                  |                |
| 3+4 6-10%                                     | 241                    | 4.1                     | 12.4                | 34.9                    | 48.5                  |                |
| 3+4 11-20%                                    | 162                    | 2.5                     | 8                   | 39.5                    | 50                    |                |
| 3+4 21-30%                                    | 112                    | 1.8                     | 7.1                 | 42                      | 49.1                  |                |
| 3+4 31-49%                                    | 77                     | 2.6                     | 6.5                 | 36.4                    | 54.5                  |                |
| 3+4 Tert.5                                    | 1                      | 0                       | 100                 | 0                       | 0                     |                |
| 4+3 50-60%                                    | 62                     | 1.6                     | 6.5                 | 38.7                    | 53.2                  |                |
| 4+3 Tert.5                                    | 4                      | 0                       | 25                  | 50                      | 25                    |                |
| 4+3 61-100%                                   | 60                     | 1.7                     | 11.7                | 40                      | 46.7                  |                |
| ≥4+4                                          | 6                      | 0                       | 16.7                | 16.7                    | 66.7                  |                |
| <b>Lymph node<br/>metastasis</b>              |                        |                         |                     |                         |                       |                |
| N0                                            | 1083                   | 3.9                     | 9.8                 | 41                      | 45.3                  | 0.392          |
| N+                                            | 65                     | 1.5                     | 15.4                | 41.5                    | 41.5                  |                |
| <b>Preoperative<br/>PSA level<br/>(ng/ml)</b> |                        |                         |                     |                         |                       |                |
| <4                                            | 333                    | 6                       | 8.1                 | 36.3                    | 49.5                  | 0.3407         |
| 04-Oct                                        | 1203                   | 5.9                     | 10.2                | 36.2                    | 47.7                  |                |
| Oct-20                                        | 465                    | 5.8                     | 11.6                | 41.3                    | 41.3                  |                |
| >20                                           | 169                    | 7.1                     | 10.7                | 40.2                    | 42                    |                |
| <b>Surgical margin</b>                        |                        |                         |                     |                         |                       |                |
| negative                                      | 1707                   | 6.9                     | 9.8                 | 38                      | 45.2                  | 0.001          |
| positive                                      | 482                    | 2.7                     | 11.6                | 36.1                    | 49.6                  |                |
